# Supplementary material for: Placotylene A, an Inhibitor of the Receptor Activator of Nuclear Factor-κB Ligand-Induced Osteoclast Differentiation, from a Korean Sponge Placospongia sp
Source: PubMed Central journal article supplement (PMC4012465; doi:10.3390/md12042054), 2014-04-03

## Supplementary Information

**Figure S1.**  $^1\text{H}$  NMR spectrum (600 MHz) of placotylene A (**1**) in chloroform-*d*.

**Figure S2.**  $^{13}\text{C}$  NMR spectrum (150 MHz) of placotylene A (**1**) in chloroform-*d*.

**Figure S3.** COSY spectrum (600 MHz) of placotylene A (**1**) in chloroform-*d*.

**Figure S4.** HSQC spectrum (600 MHz) of placotylene A (**1**) in chloroform-*d*.

**Figure S5.** HMBC spectrum (600 MHz) of placotylene A (**1**) in chloroform-*d*.

**Figure S6.**  $^1\text{H}$  NMR spectrum (600 MHz) of placotylene B (**2**) in MeOD.

**Figure S7.**  $^{13}\text{C}$  NMR spectrum (150 MHz) of placotylene B (**2**) in MeOD.

**Figure S8.** COSY spectrum (600 MHz) of placotylene B (**2**) in MeOD.

**Figure S9.** HSQC spectrum (600 MHz) of placotylene B (**2**) in MeOD.

**Figure S10.** HMBC spectrum (600 MHz) of placotylene B (**2**) in MeOD.

**Figure S1.**  $^1\text{H}$  NMR spectrum (600 MHz) of placotylene A (1) in chloroform-*d*.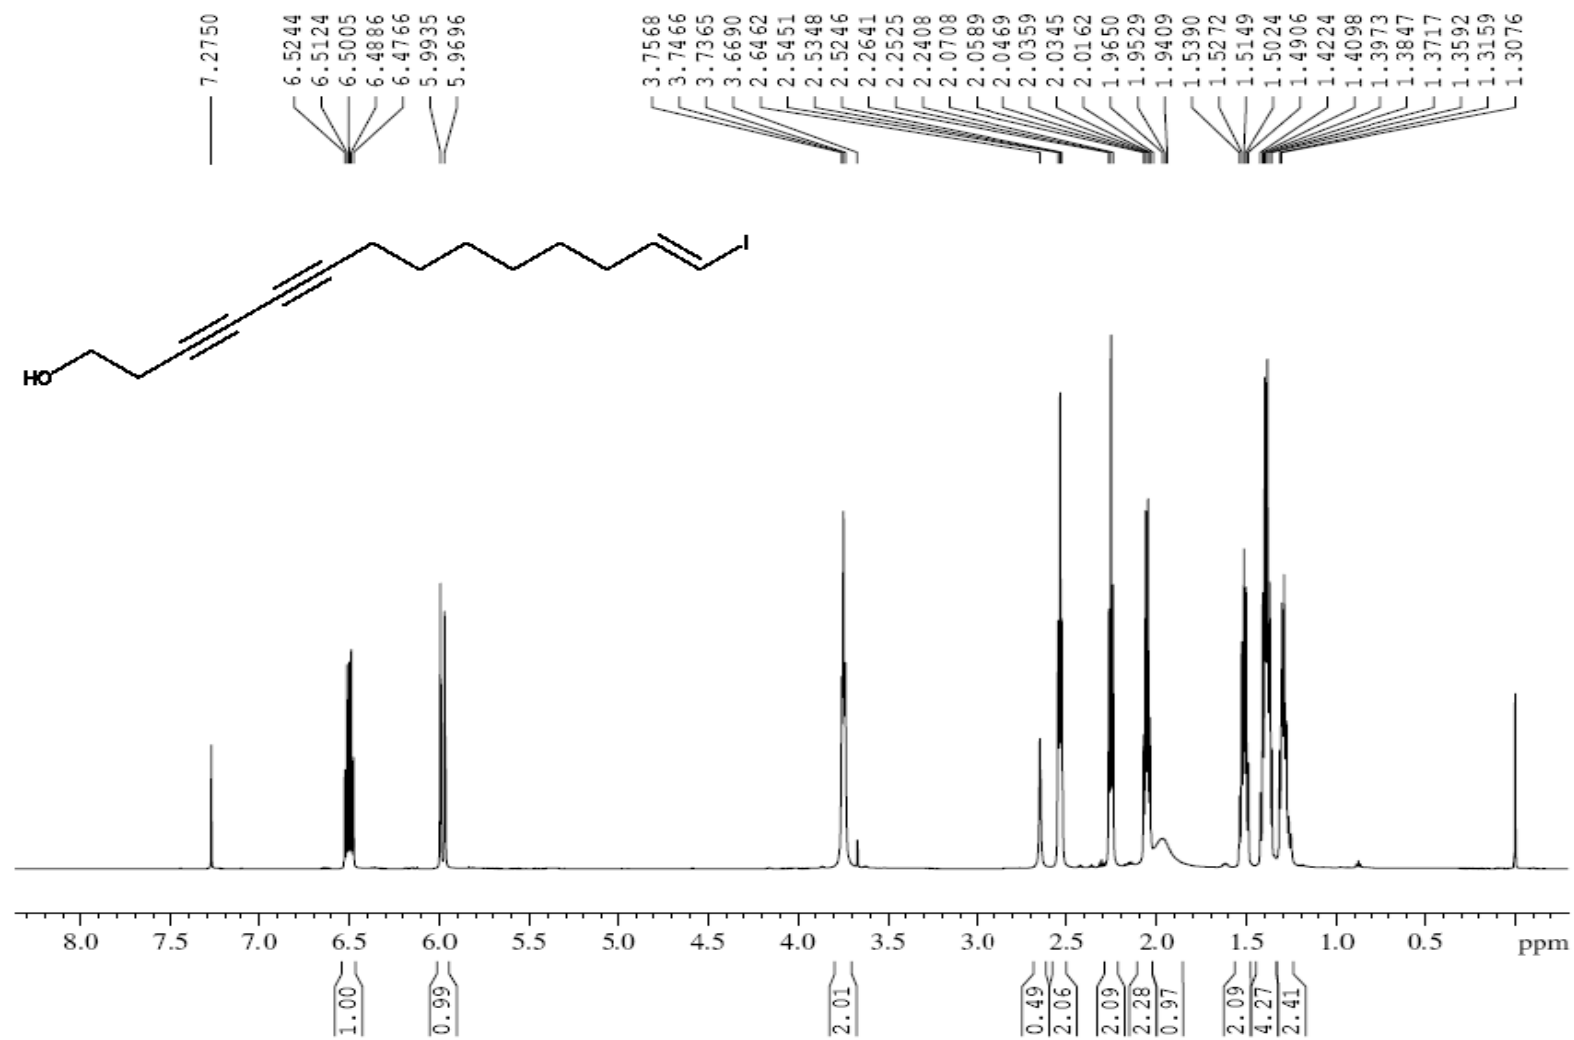

**Figure S2.**  $^{13}\text{C}$  NMR spectrum (150 MHz) of placotylenine A (1) in chloroform-*d*.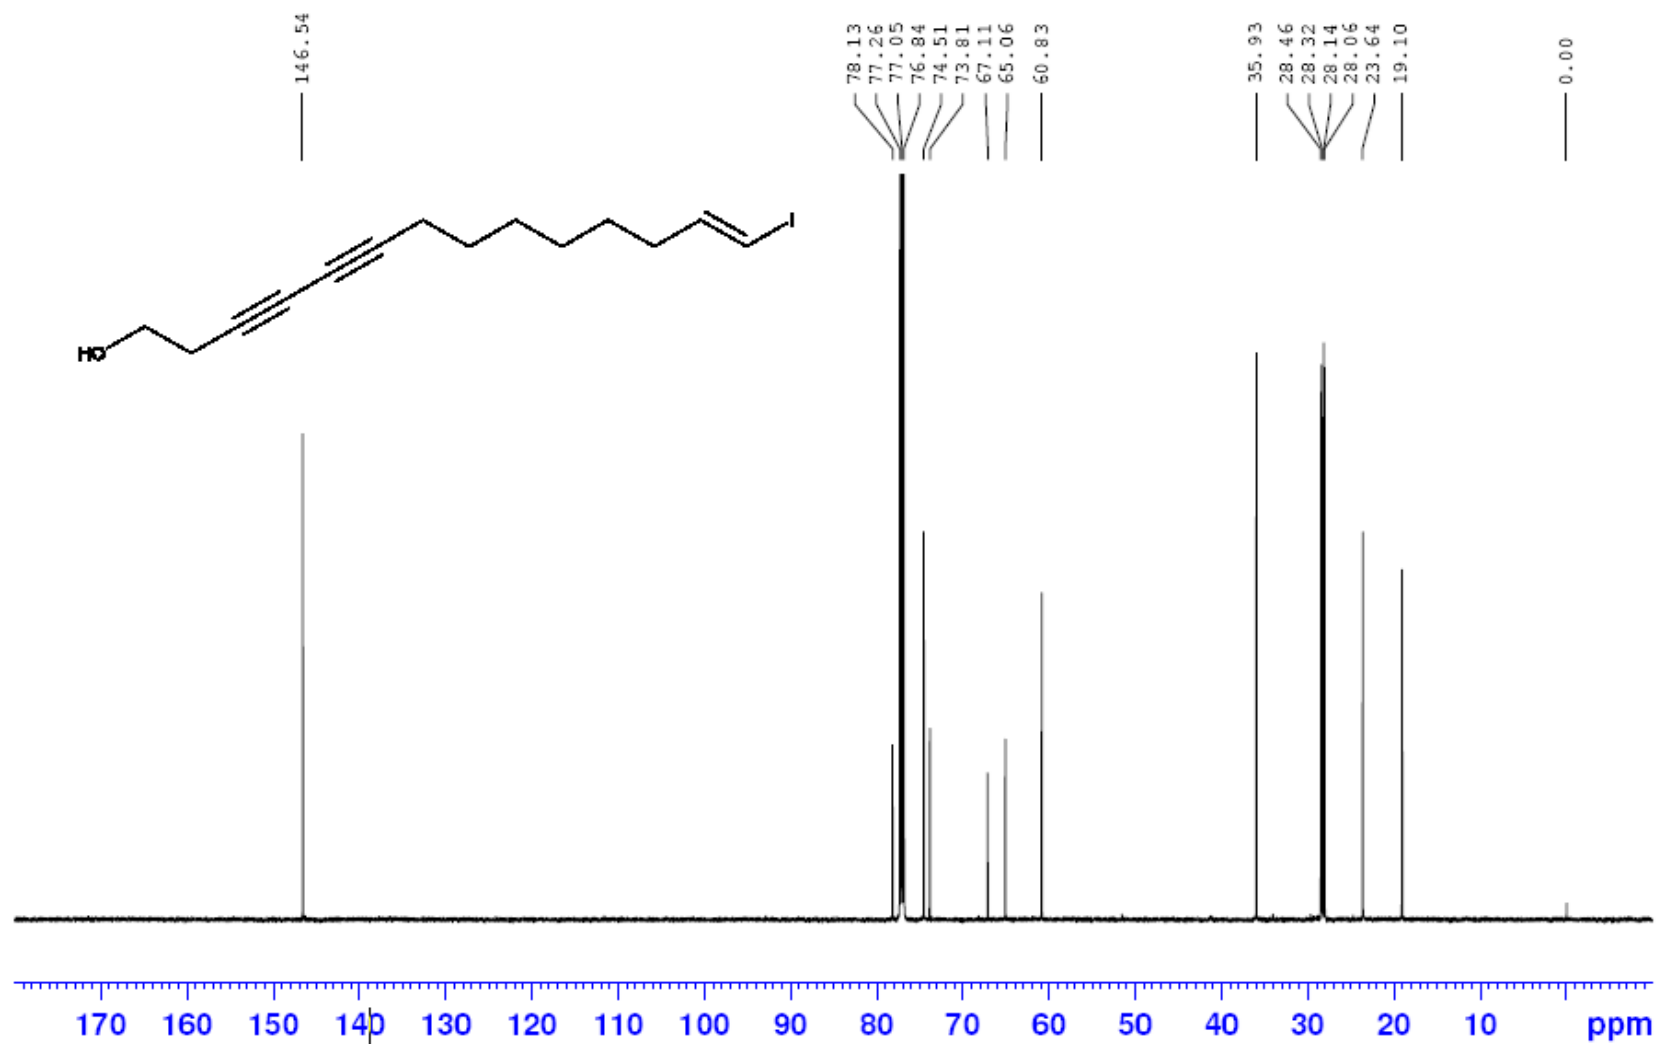

**Figure S3.** COSY spectrum (600 MHz) of placotylenine A (1) in chloroform-*d*.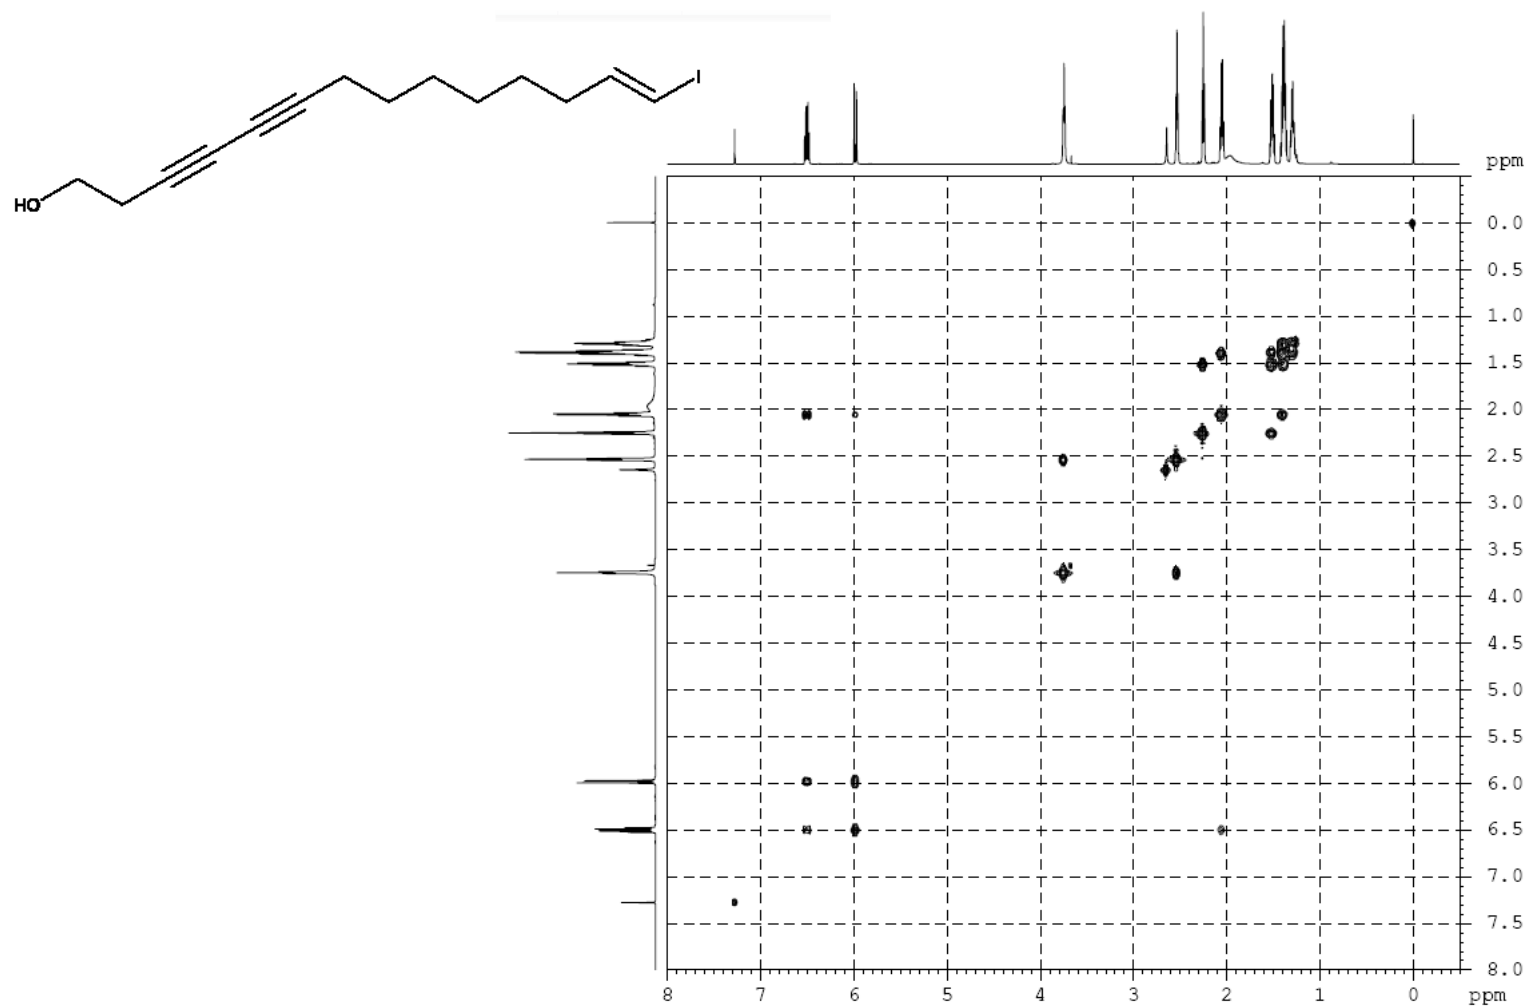

**Figure S4.** HSQC spectrum (600 MHz) of placotylenine A (**1**) in chloroform-*d*.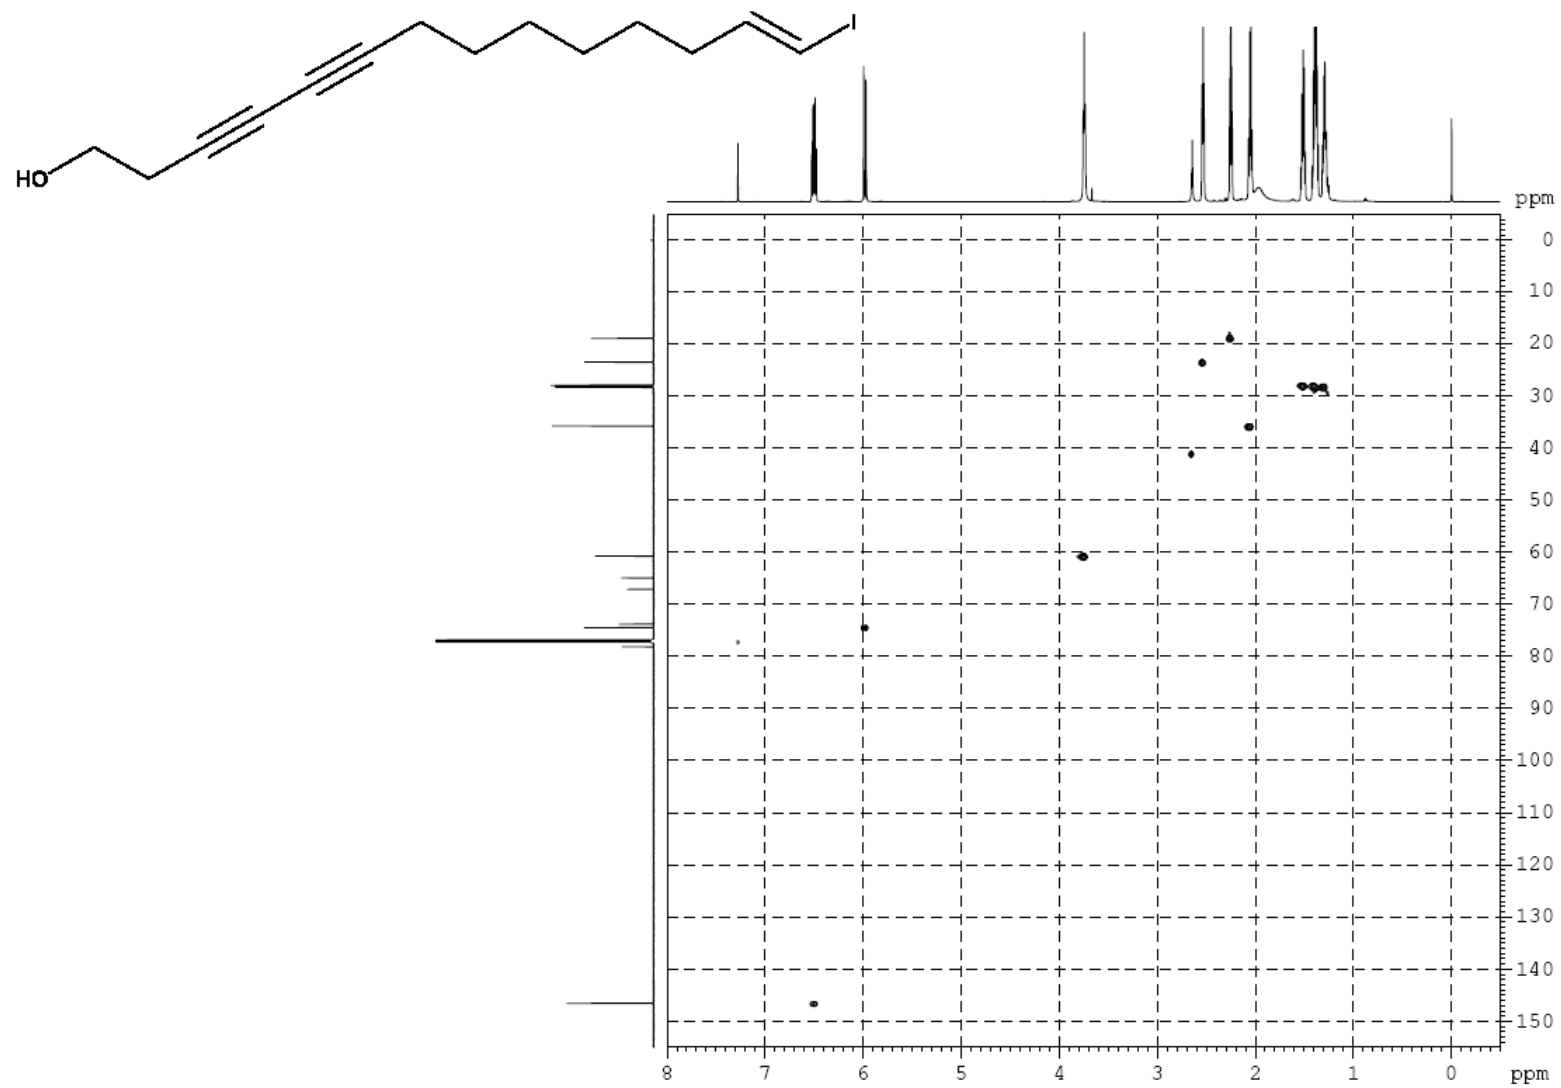

**Figure S5.** HMBC spectrum (600 MHz) of placotylenine A (1) in chloroform-*d*.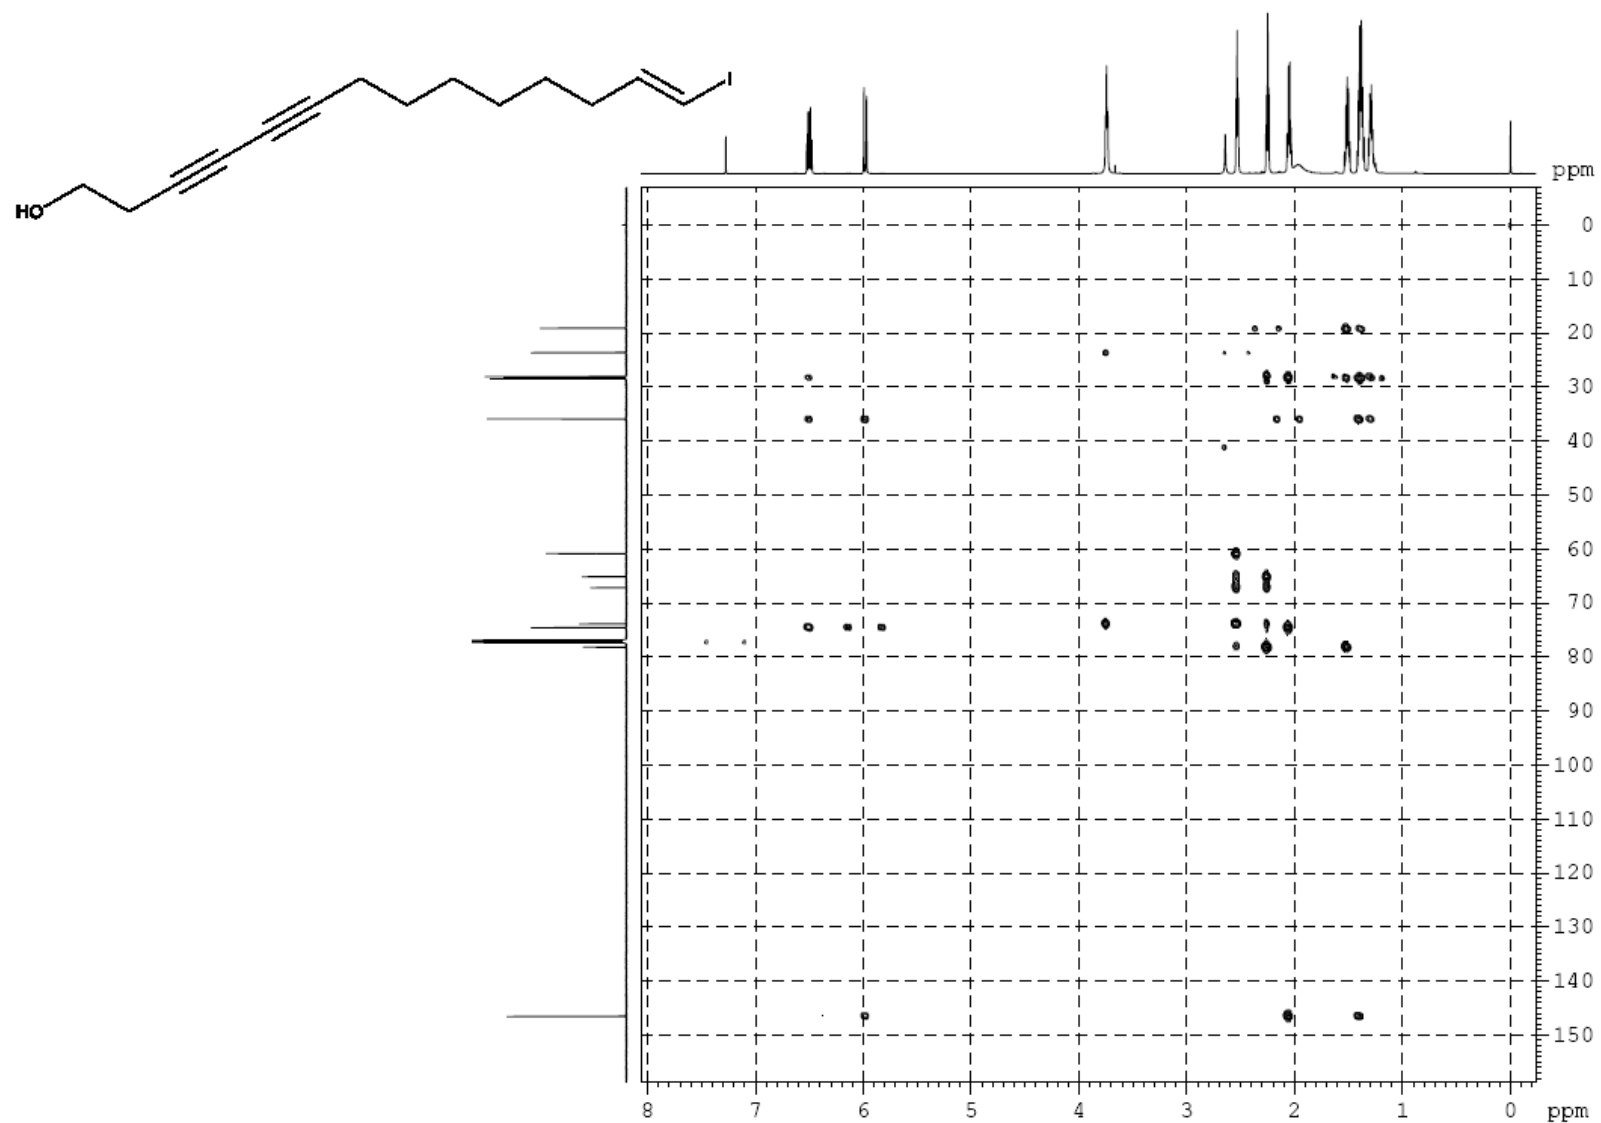

**Figure S6.**  $^1\text{H}$  NMR spectrum (600 MHz) of placotylenine B (**2**) in MeOD.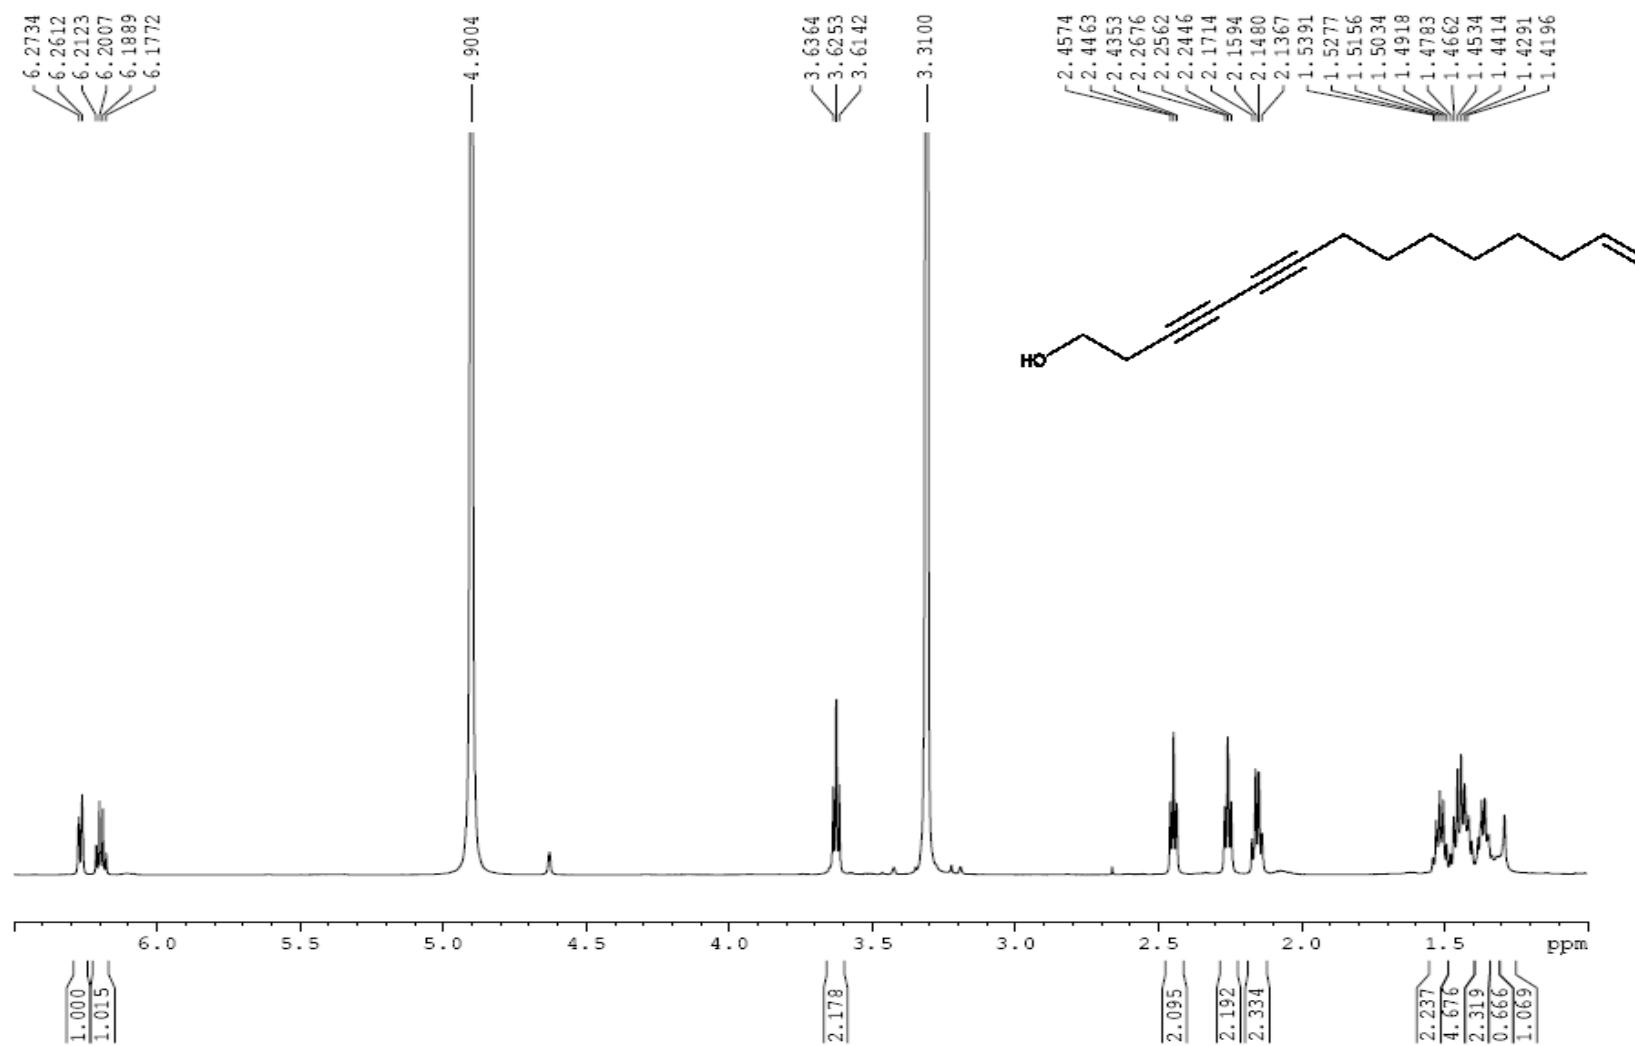

Figure S7.  $^{13}\text{C}$  NMR spectrum (150 MHz) of placotylenine B (2) in MeOD.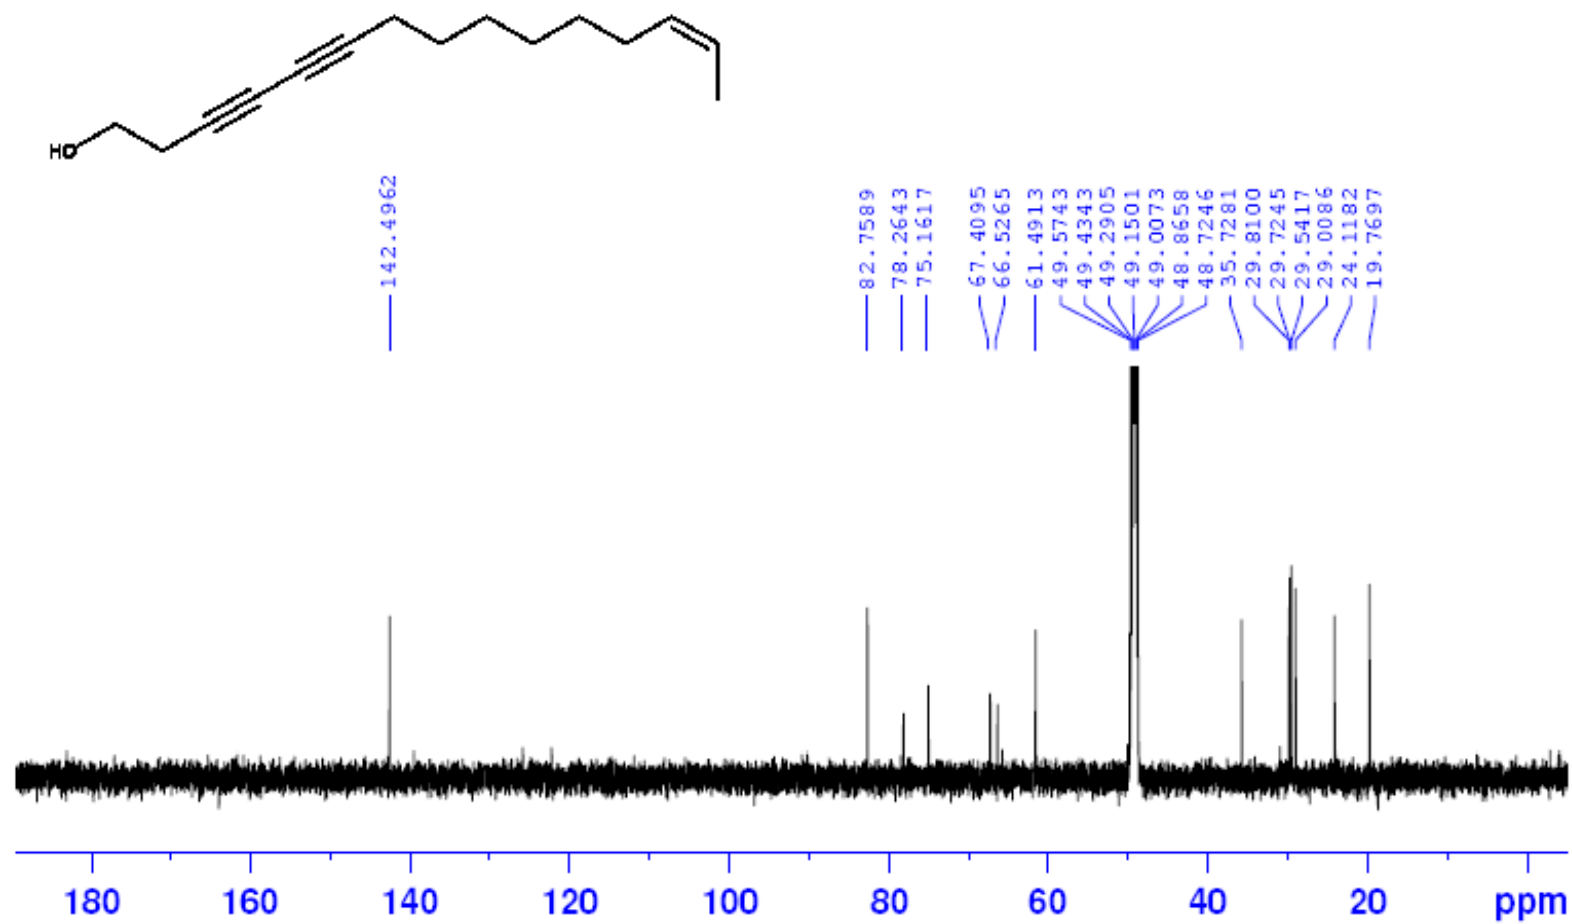



Figure S8. COSY spectrum (600 MHz) of placotylenine B (2) in MeOD.

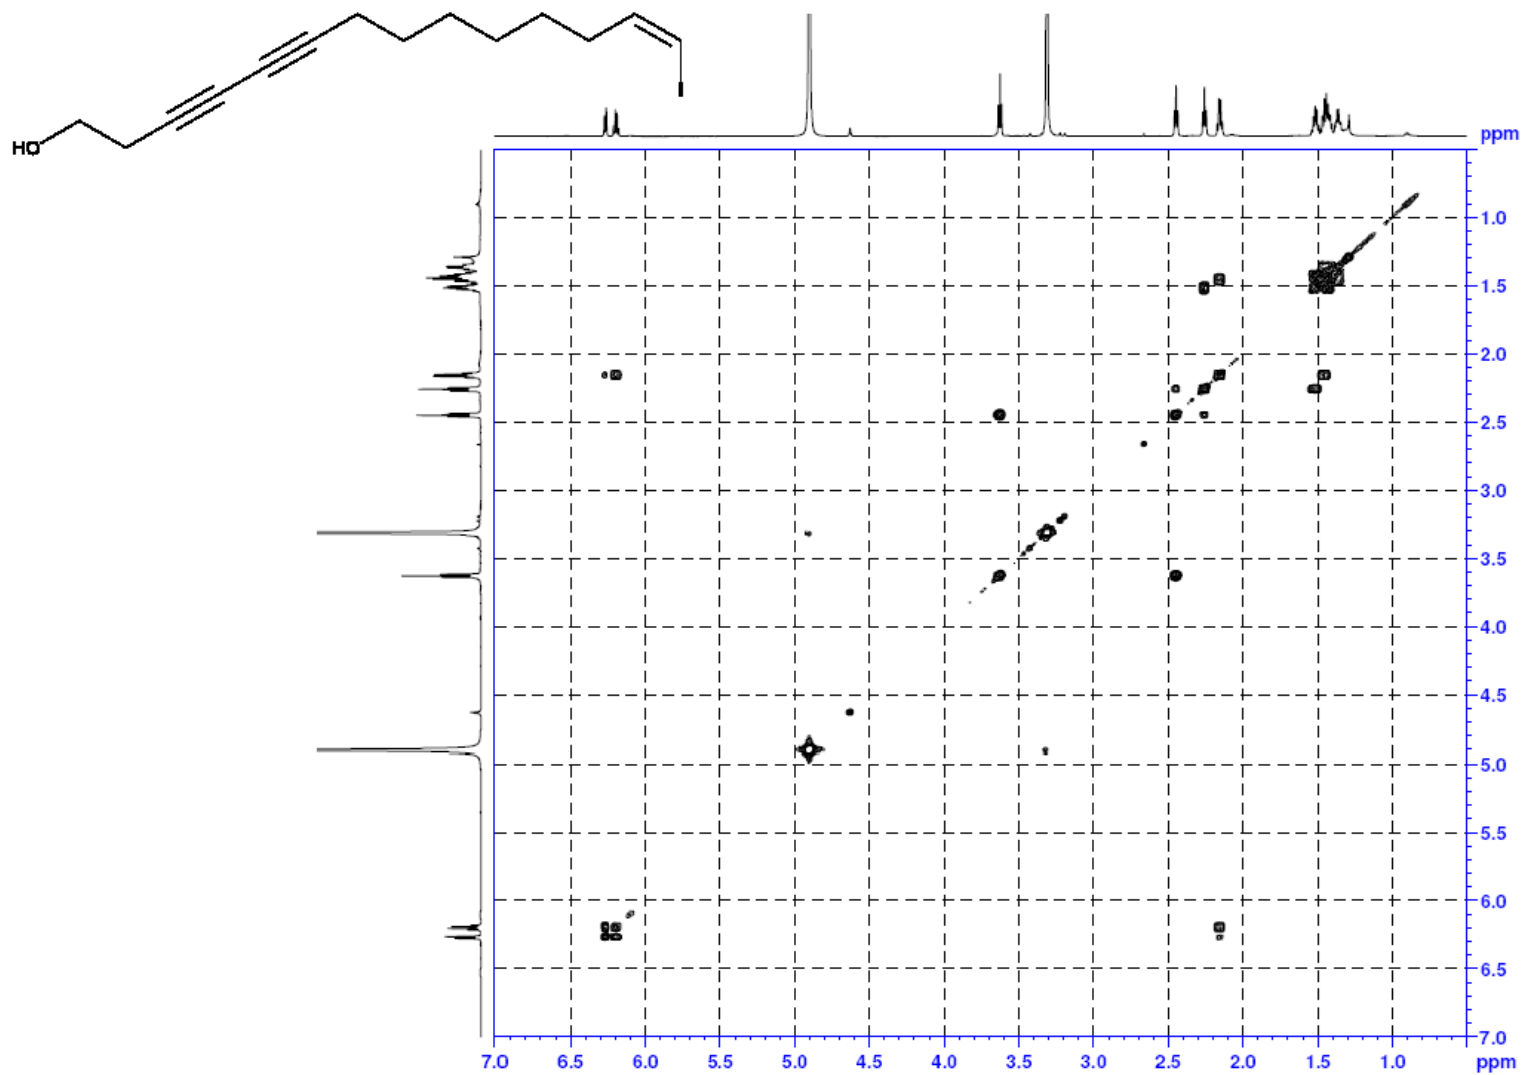

**Figure S9.** HSQC spectrum (600 MHz) of placotylenine B (2) in MeOD.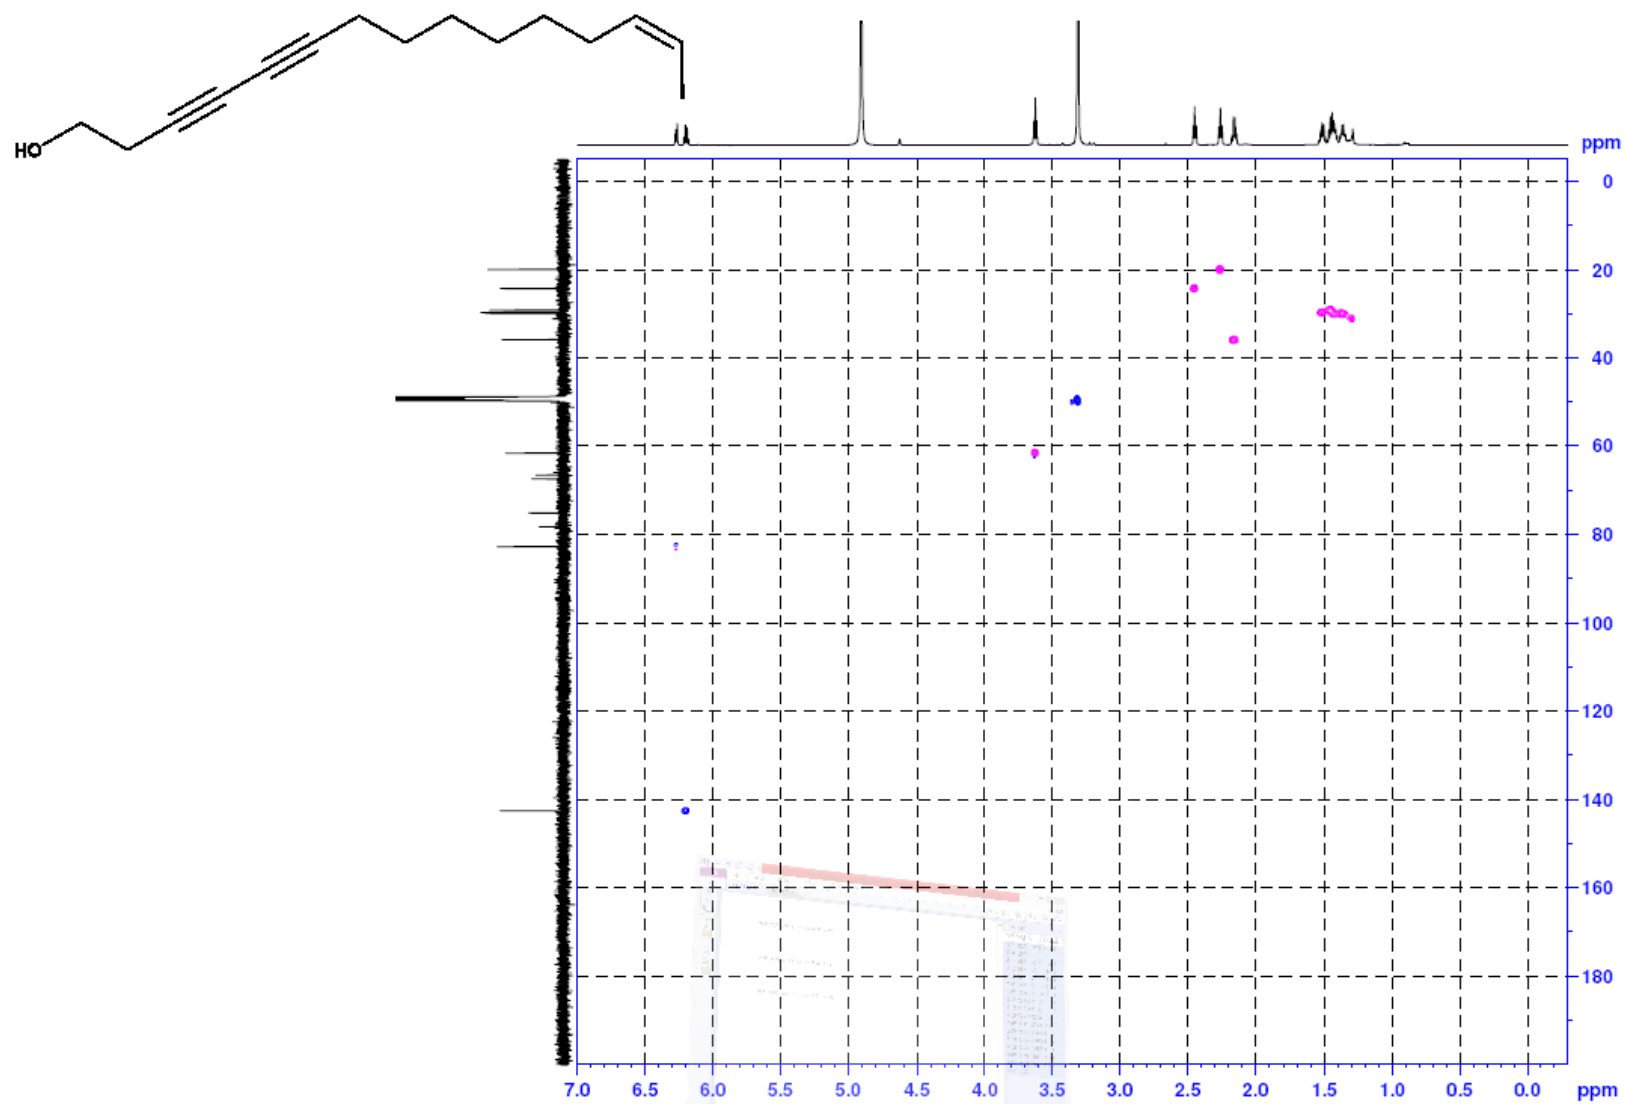

**Figure S10.** HMBC spectrum (600 MHz) of placotylenine B (2) in MeOD.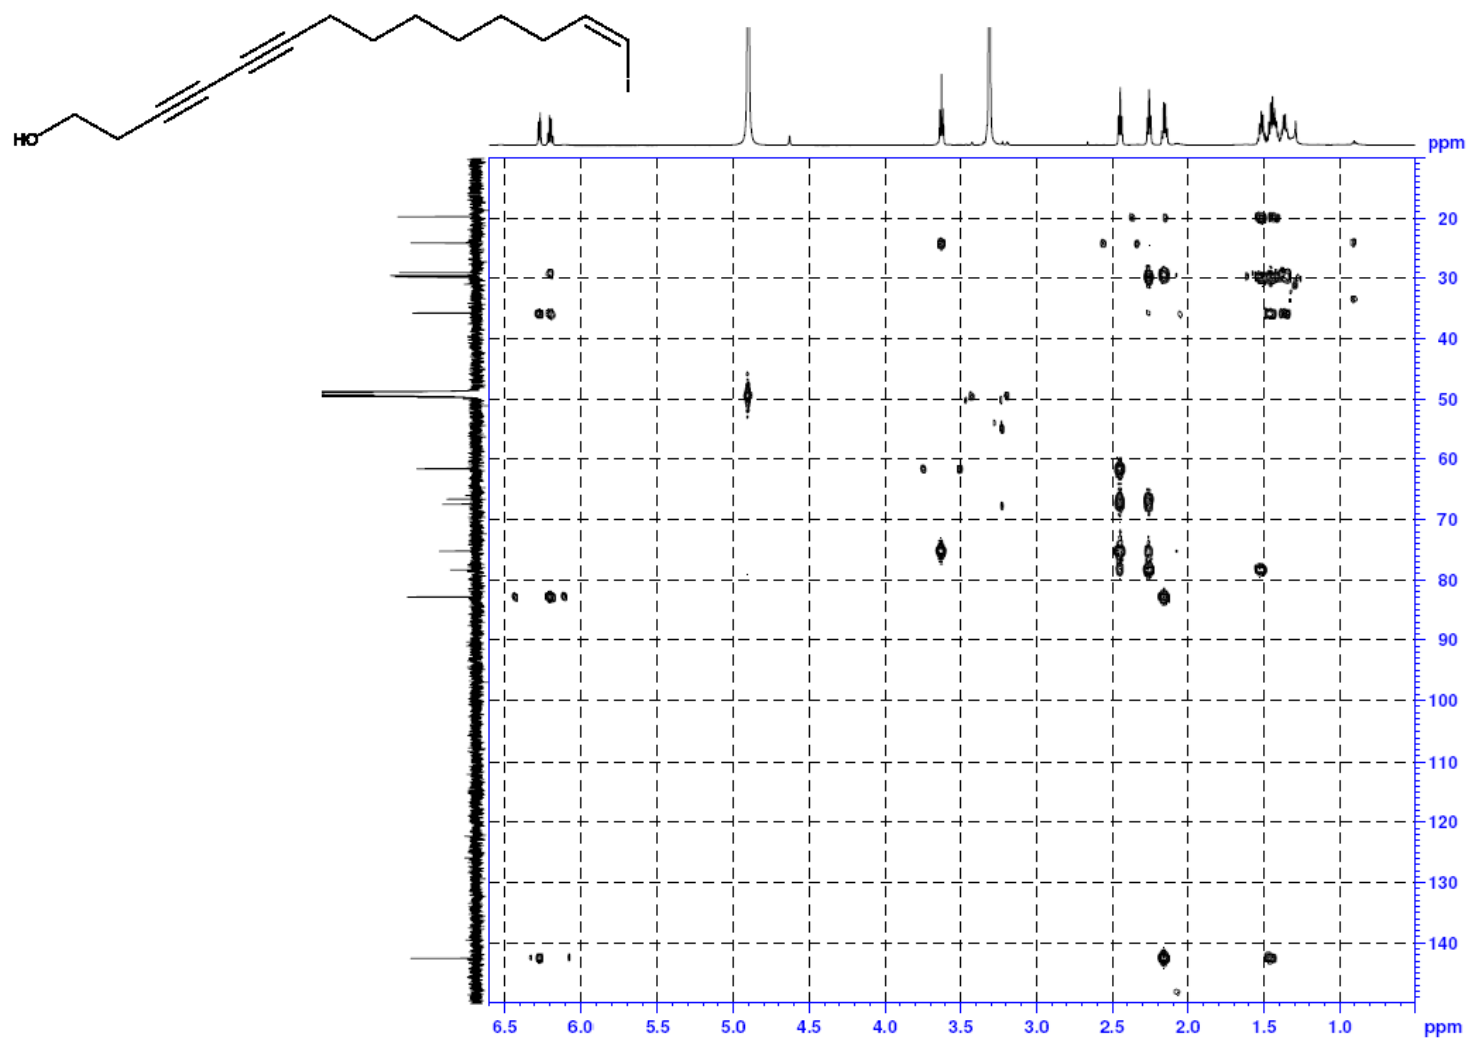

Supplement: marinedrugs-12-02054-s001.pdf [file marinedrugs-12-02054-s001.pdf]
